# Supplementary material
Source: PubMed Central journal article supplement (PMC524064)
Supplement: pnas_101_42_15136__2.pdf [file pnas_101_42_15136__2.pdf]

**Table 1. Primer description and thermal profiles for PCR amplification of *amoA***

| Primer pair*       | Sequence (5'-3')           | Round of nested PCR  | Thermal profile <sup>†</sup>                                                               | Molecular analysis          |
|--------------------|----------------------------|----------------------|--------------------------------------------------------------------------------------------|-----------------------------|
| <b>A189 (1)</b>    | <b>GGNGACTGGGACTTCTGG</b>  | 1                    | 94°C, 30 s                                                                                 | T-RFLP                      |
| amoA-2R (2)        | CCCCTCKGSAAAGCCTTCTTC      |                      | 62-52°C, <sup>‡</sup> 30 s<br>72°C, 45 s<br>30 cycles                                      |                             |
| <b>amoA-1F (2)</b> | <b>§GGGGTTTCTACTGGTGGT</b> | 2                    | 94°C, 60 s                                                                                 |                             |
| amoA-2R            | CCCCTCKGSAAAGCCTTCTTC      |                      | 55°C, 90 s<br>72°C, 90 s<br>18 cycles                                                      |                             |
| <b>A189</b>        | <b>GGNGACTGGGACTTCTGG</b>  | 1                    | 94°C, 45 s                                                                                 | Real-time PCR <sup>  </sup> |
| amoA-2R            | CCCCTCKGSAAAGCCTTCTTC      |                      | 56°C, 90 s<br>72°C, 180 s<br>13 cycles                                                     |                             |
| <b>amoA-1F</b>     | <b>GGGGTTTCTACTGGTGGT</b>  | 2<br>(Real-time PCR) | 94°C, 45 s                                                                                 |                             |
| amoA-2R            | CCCCTCKGSAAAGCCTTCTTC      |                      | 55°C, 30 s<br>72°C, 180 s<br>Plate read at 83°C<br>30 cycles<br>Melting curve <sup>¶</sup> |                             |

\*Primers in bold represent the 5'-primer.

<sup>†</sup>All PCR profiles started with an initial denaturation at 94°C for 3 min and ended with a final elongation step at 72°C for 10 min, prior to holding the temperature at 4°C.

<sup>‡</sup>Annealing temperature was decreased 0.5°C after each cycle until it reached 52°C.

<sup>§</sup>Primer labeled with 5-carboxyfluorescein.

<sup>¶</sup>Melting curve analysis: 65-98°C, 0.2°C per read, 1-s hold, final elongation step at 72°C for 10 min, prior to holding the temperature at 10°C.

<sup>||</sup>Control reactions with the primers M13F (5'-GTAAAACGACGGCCAG-3') and M13R (5'-CAGGAAACAGCTATGAC-3') were performed with identical thermal profiles.

1. Holmes, A. J., Costello, A., Lidstrom, M. E. & Murrell, J. C. (1995) *FEMS Microbiol. Lett.* **132**, 203-208.

2. Rotthauwe, J., Witzel, K. & Liesack, W. (1997) *Appl. Environ. Microbiol.* **63**, 4704-4712.
