# Supplementary material
Source: PubMed Central journal article supplement (PMC524064)
Supplement: pnas_101_42_15136__3.pdf [file pnas_101_42_15136__3.pdf]

**Table 2. Split-plot analysis of variance for the proportion of ammonia-oxidizing bacteria clade JR1 in the Jasper Ridge Global Change Experiment**

| Source                      | df | Sum of squares | Mean square | <i>F</i> | <i>P</i> |
|-----------------------------|----|----------------|-------------|----------|----------|
| Main plot comparisons       |    |                |             |          |          |
| C                           | 1  | 0.4755         | 0.4755      | 2.46     | 0.1281   |
| H                           | 1  | 0.2690         | 0.2690      | 1.39     | 0.2482   |
| C × H                       | 1  | 0.00003        | 0.00003     | 0.00     | 0.9672   |
| Error (plot{H × C})         | 28 | 5.4141         | 0.1934      |          |          |
| Subplot comparisons         |    |                |             |          |          |
| N                           | 1  | 0.5976         | 0.5976      | 10.80    | 0.0027** |
| N × C                       | 1  | 0.0534         | 0.0534      | 0.96     | 0.3344   |
| N × H                       | 1  | 0.5203         | 0.5203      | 9.40     | 0.0048** |
| N × C × H                   | 1  | 0.0507         | 0.0507      | 0.92     | 0.3469   |
| Error (N × plot{H × C})     | 28 | 1.5499         | 0.0554      |          |          |
| W                           | 1  | 0.0018         | 0.0018      | 0.03     | 0.8616   |
| W × N                       | 1  | 0.0786         | 0.0786      | 1.34     | 0.2568   |
| W × C                       | 1  | 0.1340         | 0.1340      | 2.28     | 0.1419   |
| W × H                       | 1  | 0.5874         | 0.5874      | 10.01    | 0.0037** |
| W × H × C                   | 1  | 0.0304         | 0.0304      | 0.52     | 0.4773   |
| Error (W × plot{H × C})     | 28 | 1.6426         | 0.0587      |          |          |
| N × W × C                   | 1  | 0.0982         | 0.0982      | 3.18     | 0.0861   |
| N × W × H                   | 1  | 0.2111         | 0.2111      | 6.84     | 0.0146*  |
| N × W × H × C               | 1  | 0.1167         | 0.1167      | 3.78     | 0.0627   |
| Error (N × W × plot{H × C}) | 26 | 0.8022         | 0.0309      |          |          |

Two missing data points (for plots 47 and 123) were deleted. Split-plot ANOVA was performed by using the general linear model (GLM) in the SAS statistical package (SAS Institute, Cary, NC). \*, *P* < 0.05; \*\*, *P* < 0.01; N, nitrogen; H, heat; W, water; C, CO<sub>2</sub>.
