# Supplementary material
Source: PubMed Central journal article supplement (PMC524064)
Supplement: pnas_101_42_15136__4.pdf [file pnas_101_42_15136__4.pdf]

**Table 3. Split-plot analysis of variance for the abundance of *amoA* genes in the Jasper Ridge Global Change Experiment**

| Source                      | df | Sum of squares | Mean square | <i>F</i> | <i>P</i>   |
|-----------------------------|----|----------------|-------------|----------|------------|
| Main plot comparisons       |    |                |             |          |            |
| C                           | 1  | 2.3990         | 2.3990      | 4.71     | 0.0387*    |
| H                           | 1  | 0.0019         | 0.0019      | 0.00     | 0.9523     |
| C × H                       | 1  | 1.5651         | 1.5651      | 3.07     | 0.0907     |
| Error (plot{H × C})         | 28 | 14.2738        | 0.5098      |          |            |
| Subplot comparisons         |    |                |             |          |            |
| N                           | 1  | 0.1267         | 0.1267      | 0.64     | 0.4315     |
| N × C                       | 1  | 0.0162         | 0.0162      | 0.08     | 0.7771     |
| N × H                       | 1  | 0.1673         | 0.1673      | 0.84     | 0.3669     |
| N × C × H                   | 1  | 0.0907         | 0.0907      | 0.46     | 0.5050     |
| Error (N × plot{H × C})     | 28 | 5.5689         | 0.1989      |          |            |
| W                           | 1  | 0.1600         | 0.1600      | 0.61     | 0.4414     |
| W × N                       | 1  | 0.3382         | 0.3382      | 1.29     | 0.2658     |
| W × C                       | 1  | 1.4012         | 1.4012      | 5.34     | 0.0284*    |
| W × H                       | 1  | 5.0788         | 5.0788      | 19.36    | 0.0001**** |
| W × H × C                   | 1  | 0.0050         | 0.0050      | 0.02     | 0.8910     |
| Error (W × plot{H × C})     | 28 | 7.3441         | 0.2623      |          |            |
| N × W × C                   | 1  | 0.0234         | 0.0234      | 0.13     | 0.7211     |
| N × W × H                   | 1  | 0.1962         | 0.1962      | 1.09     | 0.3061     |
| N × W × H × C               | 1  | 0.4842         | 0.4842      | 2.69     | 0.1130     |
| Error (N × W × plot{H × C}) | 26 | 4.6809         | 0.1800      |          |            |

Two missing data points (for plots 47 and 123) were deleted. Split-plot ANOVA was performed by using the general linear model (GLM) in the SAS statistical package (SAS Institute, Cary, NC). \*,  $P < 0.05$ ; \*\*\*\*,  $P < 0.0001$ ; N, nitrogen; H, heat; W, water; C, CO<sub>2</sub>.
